# Supplementary material for: Layer-by-layer polyelectrolyte complex coated poly(methacrylic acid) nanogels as a drug delivery system for controlled release: structural effects
Source: Royal Society of Chemistry journal article supplement (doi:10.1039/c4ra05066e), 2014-01-01
Supplement: c4ra05066e1.pdf [file c4ra05066e1.pdf]

*Supplementary Information for RSC Advances article:*

**“Layer-by-layer polyelectrolyte complex coated  
poly(methacrylic acid) nanogels as drug delivery system for  
controlled release: Structural effects”**

**Xiaorui Li, Pengcheng Du and Peng Liu\***

State Key Laboratory of Applied Organic Chemistry and Institute of Polymer Science  
and Engineering, College of Chemistry and Chemical Engineering, Lanzhou  
University, Lanzhou 730000, People’s Republic of China.

Fax: 86 931 8912582; Tel: 86 931 8912582.

E-mail: [pliu@lzu.edu.cn](mailto:pliu@lzu.edu.cn) (P.L.)

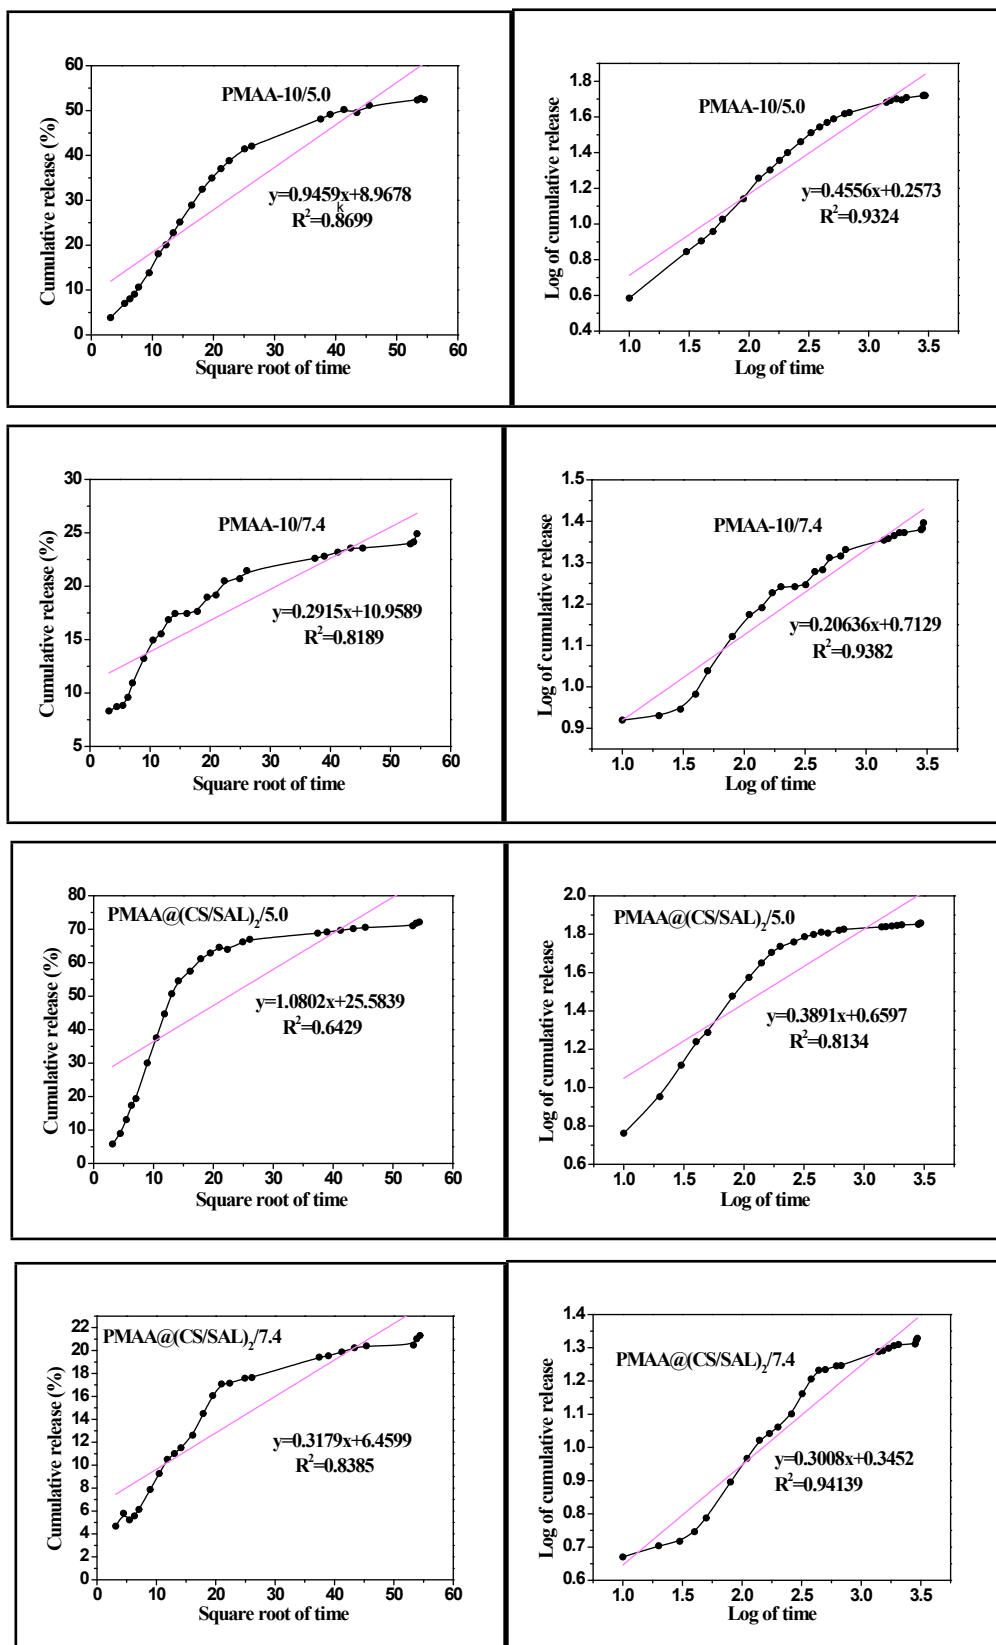

**Figure S1.** The Higuchi and Korsmeyer-Peppas release models from the DOX-loaded PMAA-10 nanogels and core-shell PMAA@(CS/SAL)<sub>2</sub> microspheres at pH 5.0 or 7.4 at 37 °C.
